# Supplementary material
Source: publisher figshare collection journal article supplement (https://sage.figshare.com/ndownloader/files/17771351)
Supplement: Supplementary file 1 [file 17771351]

## Sheet: Pearson's
Significant results (p≤0.050) are highlighted in orange throughout
Results of statistical tests: Pearson’s product-moment correlations between dung fungal spore influx and total pollen influx in pollen traps
	Total dung fungi		Podospora		Sordaria		Sporormiella
	r	p	r	p	r	p	r	p
Winter 2014-2015	0.361	0.276	0.396	0.228	0.305	0.362	0.206	0.543
Summer 2015	0.704	0.034	0.655	0.056	0.639	0.064	0.008	0.983
Winter 2015-2016	0.919	0.01	0.88	0.021	0.543	0.266	0.115	0.829
Summer 2016	0.086	0.814	0.154	0.672	-0.089	0.806	na	na
All winter samples	0.508	0.037	0.539	0.026	0.429	0.086	0.365	0.149
All summer samples	0.208	0.394	0.28	0.246	0.022	0.928	-0.153	0.532
All pollen trap samples	-0.096	0.578	-0.058	0.736	-0.067	0.696	-0.196	0.253
Oct 2014 - Sep 2015	-0.109	0.647	-0.103	0.666	-0.012	0.959	-0.199	0.4
Oct 2015 - Sep 2016	0.316	0.234	0.383	0.143	0.035	0.898	-0.373	0.155
Results of statistical tests: Pearson’s product-moment correlations between dung fungal spore influx and Poaceae pollen influx in pollen traps
	Total dung fungi		Podospora		Sordaria		Sporormiella
	r	p	r	p	r	p	r	p
Winter 2014-2015	0.517	0.103	0.592	0.055	0.377	0.253	0.293	0.382
Summer 2015	0.387	0.303	0.294	0.443	0.339	0.372	0.319	0.402
Winter 2015-2016	0.781	0.067	0.672	0.143	0.618	0.191	0.116	0.827
Summer 2016	0.024	0.947	0.143	0.694	-0.196	0.588	na	na
All winter samples	0.633	0.006	0.689	0.002	0.494	0.044	0.442	0.076
All summer samples	0.164	0.501	0.214	0.379	-0.021	0.932	0.088	0.721
All pollen trap samples	-0.226	0.184	-0.194	0.256	-0.186	0.276	-0.28	0.098
Oct 2014 - Sep 2015	-0.3	0.199	-0.308	0.187	-0.188	0.427	-0.309	0.185
Oct 2015 - Sep 2016	0.281	0.293	0.376	0.152	-0.027	0.922	-0.372	0.156
Results of statistical tests: Pearson’s product-moment correlations between dung fungal spore influx and and dung fungal spores as % of total pollen sum
	r	p
Winter 2014-2015	0.607	0.047
Summer 2015	0.951	0
Winter 2015-2016	0.863	0.027
Summer 2016	0.926	0
All winter samples	0.699	0.002
All summer samples	0.929	0
All pollen trap samples	0.756	0
Oct 2014 - Sep 2015	0.735	0
Oct 2015 - Sep 2016	0.085	0.755

## Sheet: Spearman's
Significant results (p≤0.050) are highlighted in orange throughout
Results of statistical tests: correlations (Spearman's rho) between environmental variables and dung fungal spore influx, total pollen influx and Poaceae pollen influx in pollen traps
Winter 2014-2015
	Total dung fungi		Podospora		Sordaria		Sporormiella		Pollen total		Poaceae
Environmental variable	Spearman's rho	p	Spearman's rho	p	Spearman's rho	p	Spearman's rho	p	Spearman's rho	p	Spearman's rho	p
Cover	0.203	0.55	-0.059	0.864	0.494	0.122	0.059	0.863	0.404	0.218	0.231	0.494
Vegetation	0.273	0.417	0.015	0.965	0.481	0.134	0.075	0.826	0.574	0.065	0.441	0.174
Wetness year-round	0.195	0.565	0.237	0.483	0.098	0.74	0.239	0.479	-0.389	0.237	-0.35	0.291
Wetness winter	0.081	0.813	0.119	0.727	-0.015	0.966	0.196	0.564	-0.486	0.13	-0.397	0.226
Utilization level year-round	0.424	0.194	0.532	0.092	0.169	0.619	0.193	0.57	0.025	0.941	0.229	0.498
Utilization level winter	0.523	0.099	0.68	0.021	0.45	0.165	0.229	0.498	0.522	0.1	0.596	0.053
Summer 2015
	Total dung fungi		Podospora		Sordaria		Sporormiella		Pollen total		Poaceae
Environmental variable	Spearman's rho	p	Spearman's rho	p	Spearman's rho	p	Spearman's rho	p	Spearman's rho	p	Spearman's rho	p
Cover	0.087	0.823	0.09	0.817	0.318	0.404	-0.598	0.089	0.087	0.825	-0.606	0.084
Vegetation	-0.004	0.991	0.042	0.915	0.206	0.596	-0.553	0.122	0.151	0.697	-0.437	0.24
Wetness year-round	-0.056	0.885	-0.136	0.727	-0.166	0.669	0.231	0.549	-0.373	0.323	-0.224	0.563
Wetness summer	-0.263	0.494	-0.272	0.478	-0.528	0.144	0.463	0.21	-0.149	0.702	-0.224	0.563
Utilization level year-round	0.166	0.67	0.172	0.659	-0.019	0.961	0.34	0.37	0.402	0.284	0.749	0.02
Utilization level summer	-0.138	0.723	-0.143	0.714	-0.383	0.309	0.567	0.111	0.32	0.402	0.456	0.217
Winter 2015-2016
	Total dung fungi		Podospora		Sordaria		Sporormiella		Pollen total		Poaceae
Environmental variable	Spearman's rho	p	Spearman's rho	p	Spearman's rho	p	Spearman's rho	p	Spearman's rho	p	Spearman's rho	p
Cover	0.693	0.127	0.933	0.007	0.527	0.283	-0.115	0.828	0.683	0.135	0.878	0.021
Vegetation	0.693	0.127	0.933	0.007	0.527	0.283	-0.115	0.828	0.683	0.135	0.878	0.021
Wetness year-round	-0.391	0.443	-0.328	0.526	-0.017	0.975	0.237	0.651	-0.463	0.355	-0.185	0.725
Wetness winter	-0.495	0.318	-0.311	0.548	-0.527	0.283	-0.115	0.828	-0.488	0.326	-0.293	0.573
Utilization level year-round	-0.693	0.127	-0.933	0.007	-0.527	0.283	0.115	0.828	-0.683	0.135	-0.787	0.021
Utilization level winter	0.133	0.802	-0.417	0.41	0.424	0.402	0.775	0.07	0.131	0.805	-0.131	0.805
Summer 2016
	Total dung fungi		Podospora		Sordaria		Sporormiella		Pollen total		Poaceae
Environmental variable	Spearman's rho	p	Spearman's rho	p	Spearman's rho	p	Spearman's rho	p	Spearman's rho	p	Spearman's rho	p
Cover	0.359	0.308	0.186	0.608	0.497	0.144			0.035	0.924	-0.87	0.001
Vegetation	0.44	0.202	0.14	0.699	0.751	0.012			0.026	0.942	-0.724	0.018
Wetness year-round	-0.221	0.54	0.07	0.847	-0.657	0.039			-0.375	0.286	0.296	0.406
Wetness summer	-0.146	0.687	0.098	0.787	-0.47	0.171			-0.072	0.843	0.257	0.474
Utilization level year-round	0.156	0.668	0.107	0.768	0.215	0.551			-0.281	0.431	0.603	0.065
Utilization level summer	-0.169	0.64	-0.1	0.783	0.005	0.99			-0.034	0.927	0.328	0.354
All winter samples
	Total dung fungi		Podospora		Sordaria		Sporormiella		Pollen total		Poaceae
Environmental variable	Spearman's rho	p	Spearman's rho	p	Spearman's rho	p	Spearman's rho	p	Spearman's rho	p	Spearman's rho	p
Cover	0.205	0.431	0.133	0.61	0.449	0.07	0.051	0.846	0.337	0.186	0.265	0.305
Vegetation	0.293	0.253	0.21	0.419	0.494	0.044	0.132	0.613	0.465	0.06	0.404	0.108
Wetness year-round	-0.052	0.842	-0.038	0.885	-0.024	0.927	0.106	0.685	-0.321	0.209	-0.21	0.418
Wetness winter	-0.111	0.671	-0.077	0.768	-0.178	0.495	-0.026	0.922	-0.384	0.128	-0.263	0.308
Utilization level year-round	0.241	0.351	0.254	0.325	0.02	0.941	0.245	0.342	0.022	0.933	0.111	0.672
Utilization level winter	0.252	0.329	0.254	0.325	0.318	0.213	0.333	0.192	0.252	0.329	0.252	0.329
All summer samples
	Total dung fungi		Podospora		Sordaria		Sporormiella		Pollen total		Poaceae
Environmental variable	Spearman's rho	p	Spearman's rho	p	Spearman's rho	p	Spearman's rho	p	Spearman's rho	p	Spearman's rho	p
Cover	0.264	0.275	0.142	0.561	0.445	0.056	-0.362	0.128	0	1	-0.731	0
Vegetation	0.267	0.268	0.095	0.698	0.521	0.022	-0.339	0.156	0.038	0.877	-0.579	0.009
Wetness year-round	-0.181	0.46	-0.018	0.94	-0.409	0.082	0.104	0.673	-0.314	0.191	0.085	0.729
Wetness summer	-0.206	0.397	-0.043	0.861	-0.474	0.04	0.242	0.318	-0.066	0.789	0.085	0.729
Utilization level year-round	0.132	0.589	0.136	0.578	0.058	0.813	0.207	0.394	0.081	0.741	0.626	0.004
Utilization level summer	-0.158	0.518	-0.1	0.683	-0.219	0.368	0.346	0.147	0.146	0.55	0.37	0.119
Oct 2014 - Sep 2015
	Total dung fungi		Podospora		Sordaria		Sporormiella		Pollen total		Poaceae
Environmental variable	Spearman's rho	p	Spearman's rho	p	Spearman's rho	p	Spearman's rho	p	Spearman's rho	p	Spearman's rho	p
Cover	0.122	0.608	-0.009	0.971	0.364	0.115	-0.105	0.659	0.253	0.282	-0.078	0.742
Vegetation	0.131	0.582	-0.002	0.993	0.316	0.175	-0.068	0.774	0.402	0.079	0.066	0.781
Wetness year-round	0.127	0.593	0.22	0.351	0.025	0.917	0.203	0.391	-0.48	0.032	-0.375	0.103
Wetness winter	0.028	0.908	0.119	0.618	-0.082	0.73	0.131	0.582	-0.504	0.023	-0.343	0.139
Wetness summer	0.04	0.866	0.087	0.717	-0.112	0.639	0.279	0.234	-0.365	0.113	-0.339	0.143
Utilization level year-round	0.263	0.262	0.29	0.216	0.112	0.638	0.242	0.305	0.15	0.527	0.25	0.287
Utilization level winter	0.434	0.056	0.436	0.055	0.485	0.03	0.071	0.765	0.455	0.044	0.412	0.071
Utilization level summer	-0.003	0.989	-0.01	0.966	-0.167	0.481	0.159	0.503	-0.067	0.78	0.002	0.994
Oct 2015 - Sep 2016
	Total dung fungi		Podospora		Sordaria		Sporormiella		Pollen total		Poaceae
Environmental variable	Spearman's rho	p	Spearman's rho	p	Spearman's rho	p	Spearman's rho	p	Spearman's rho	p	Spearman's rho	p
Cover	0.432	0.095	0.377	0.151	0.516	0.041	-0.024	0.931	0.108	0.689	-0.217	0.42
Vegetation	0.507	0.045	0.336	0.204	0.641	0.007	-0.065	0.812	0.169	0.533	-0.13	0.632
Wetness year-round	-0.354	0.178	-0.133	0.623	-0.398	0.127	0.25	0.35	-0.364	0.165	-0.077	0.778
Wetness winter	-0.58	0.018	-0.288	0.279	-0.585	0.017	0.07	0.797	-0.279	0.296	-0.114	0.673
Wetness summer	-0.285	0.284	-0.079	0.773	-0.431	0.095	0.061	0.822	-0.141	0.603	0.013	0.963
Utilization level year-round	-0.089	0.743	-0.111	0.682	-0.128	0.635	-0.047	0.862	-0.079	0.771	0.257	0.336
Utilization level winter	0.41	0.115	0.223	0.407	0.361	0.17	0.332	0.209	-0.052	0.848	0.122	0.654
Utilization level summer	-0.298	0.263	-0.155	0.567	-0.359	0.171	-0.403	0.122	0.029	0.915	0.145	0.592
All pollen trap samples
	Total dung fungi		Podospora		Sordaria		Sporormiella		Pollen total		Poaceae
Environmental variable	Spearman's rho	p	Spearman's rho	p	Spearman's rho	p	Spearman's rho	p	Spearman's rho	p	Spearman's rho	p
Cover	0.229	0.179	0.142	0.409	0.427	0.009	-0.076	0.661	0.131	0.446	-0.158	0.357
Vegetation	0.261	0.124	0.133	0.439	0.46	0.005	-0.046	0.789	0.244	0.151	-0.044	0.798
Wetness year-round	-0.074	0.669	0.055	0.751	-0.162	0.346	0.14	0.415	-0.379	0.023	-0.19	0.268
Wetness winter	-0.193	0.26	-0.039	0.822	-0.292	0.084	0.05	0.773	-0.358	0.032	-0.203	0.235
Wetness summer	-0.067	0.699	0.044	0.801	-0.237	0.164	0.172	0.316	-0.211	0.216	-0.113	0.512
Utilization level year-round	0.142	0.408	0.141	0.413	0.014	0.934	0.181	0.291	0.085	0.623	0.253	0.137
Utilization level winter	0.364	0.029	0.289	0.087	0.382	0.021	0.12	0.482	0.193	0.261	0.226	0.184
Utilization level summer	-0.056	0.745	-0.018	0.919	-0.209	0.221	0.049	0.776	0.035	0.838	0.107	0.533

## Sheet: Mann-Whitney U
Significant results (p≤0.050) are highlighted in orange throughout
Results of statistical tests: Mann-Whitney U-test for differences in dung fungal spore influx, total pollen influx and Poaceae pollen influx in pollen traps between different environments or grazing intensities
Winter 2014-2015
	Total dung fungi		Podospora		Sordaria		Sporormiella		Pollen total		Poaceae
Environmental variable	Mann-Whitney U	p	Mann-Whitney U	p	Mann-Whitney U	p	Mann-Whitney U	p	Mann-Whitney U	p	Mann-Whitney U	p	nCat1	nCat2	Category 1	Category 2
Cover	11.5	0.522	14	0.853	6.5	0.118	14	0.852	8	0.201	11	0.465	5	6	open	closed
Utilization level winter	2	0.098	0	0.031	3	0.154	6	0.469	2	0.099	1	0.159	9	2	low	high
Summer 2015
	Total dung fungi		Podospora		Sordaria		Sporormiella		Pollen total		Poaceae
Environmental variable	Mann-Whitney U	p	Mann-Whitney U	p	Mann-Whitney U	p	Mann-Whitney U	p	Mann-Whitney U	p	Mann-Whitney U	p	nCat1	nCat2	Category 1	Category 2
Cover	9	0.805	9	0.798	6.5	0.368	5	0.091	9	0.806	3	0.086	4	5	open	closed
Winter 2015-2016
	Total dung fungi		Podospora		Sordaria		Sporormiella		Pollen total		Poaceae
Environmental variable	Mann-Whitney U	p	Mann-Whitney U	p	Mann-Whitney U	p	Mann-Whitney U	p	Mann-Whitney U	p	Mann-Whitney U	p	nCat1	nCat2	Category 1	Category 2
Cover	1	0.121	0	0.037	2	0.239	4	0.796	1	0.127	0	0.05	3	3	open	closed
Vegetation	1	0.121	0	0.037	2	0.239	4	0.796	1	0.127	0	0.05	3	3	grassland	deciduous
Wetness winter	2	0.268	3	0.487	2	0.239	4	0.796	2	0.275	3	0.513	3	3	medium	wet
Utilization level year-round	1	0.121	0	0.037	2	0.239	4	0.796	1	0.127	0	0.05	3	3	low	medium
Utilization level winter	2	0.766	1	0.351	1	0.343	0	0.083	2	0.77	2	0.77	5	1	low	high
Summer 2016
	Total dung fungi		Podospora		Sordaria		Sporormiella		Pollen total		Poaceae
Environmental variable	Mann-Whitney U	p	Mann-Whitney U	p	Mann-Whitney U	p	Mann-Whitney U	p	Mann-Whitney U	p	Mann-Whitney U	p	nCat1	nCat2	Category 1	Category 2
Cover	7.5	0.281	10	0.577	7.5	0.136			12	0.917	0	0.009	5	5	open	closed
All winter samples
	Total dung fungi		Podospora		Sordaria		Sporormiella		Pollen total		Poaceae
Environmental variable	Mann-Whitney U	p	Mann-Whitney U	p	Mann-Whitney U	p	Mann-Whitney U	p	Mann-Whitney U	p	Mann-Whitney U	p	nCat1	nCat2	Category 1	Category 2
Cover	27.5	0.413	30.5	0.594	17.5	0.072	34	0.839	22	0.178	25	0.29	8	9	open	closed
Utilization level winter	13	0.313	13	0.31	11	0.203	11	0.183	13	0.313	13	0.313	14	3	low	high
All summer samples
	Total dung fungi		Podospora		Sordaria		Sporormiella		Pollen total		Poaceae
Environmental variable	Mann-Whitney U	p	Mann-Whitney U	p	Mann-Whitney U	p	Mann-Whitney U	p	Mann-Whitney U	p	Mann-Whitney U	p	nCat1	nCat2	Category 1	Category 2
Cover	31.5	0.263	38	0.546	25	0.059	35	0.125	45	1	7	0.002	9	10	open	closed
Oct 2014 - Sep 2015
	Total dung fungi		Podospora		Sordaria		Sporormiella		Pollen total		Poaceae
Environmental variable	Mann-Whitney U	p	Mann-Whitney U	p	Mann-Whitney U	p	Mann-Whitney U	p	Mann-Whitney U	p	Mann-Whitney U	p	nCat1	nCat2	Category 1	Category 2
Cover	42.5	0.594	49	0.97	29	0.113	44	0.647	35	0.271	45	0.732	9	11	open	closed
Utilization level winter	12	0.058	12	0.057	10	0.034	29	0.756	11	0.047	13	0.073	16	4	low	high
Oct 2015 - Sep 2016
	Total dung fungi		Podospora		Sordaria		Sporormiella		Pollen total		Poaceae
Environmental variable	Mann-Whitney U	p	Mann-Whitney U	p	Mann-Whitney U	p	Mann-Whitney U	p	Mann-Whitney U	p	Mann-Whitney U	p	nCat1	nCat2	Category 1	Category 2
Cover	16.5	0.095	19	0.145	15.5	0.046	31.5	0.927	28	0.674	24	0.401	8	8	open	closed
Utilization level winter	8	0.112	13.5	0.389	10.5	0.162	14	0.198	18	0.84	16	0.638	13	3	closed	open
All pollen trap samples
	Total dung fungi		Podospora		Sordaria		Sporormiella		Pollen total		Poaceae
Environmental variable	Mann-Whitney U	p	Mann-Whitney U	p	Mann-Whitney U	p	Mann-Whitney U	p	Mann-Whitney U	p	Mann-Whitney U	p	nCat1	nCat2	Category 1	Category 2
Cover	119	0.176	.135.5	0.401	85.5	0.012	150	0.655	137	0.438	132	0.35	17	19	open	closed
Utilization level winter	48	0.032	59.5	0.087	47.5	0.024	87	0.477	73	0.255	68	0.181	29	7	low	high

## Sheet: Kruskal-Wallis
Significant results (p≤0.050) are highlighted in orange throughout
Results of statistical tests: Kruskal-Wallis test for differences in dung fungal spore influx, total pollen influx and Poaceae pollen influx in pollen traps between different environments or grazing intensities
Winter 2014-2015
	Total dung fungi		Podospora		Sordaria		Sporormiella		Pollen total		Poaceae
Environmental variable	chi-square	p	chi-square	p	chi-square	p	chi-square	p	chi-square	p	chi-square	p	nCat1	nCat2	nCat3	Category 1	Category 2	Category 3
Vegetation	0.96	0.619	0.416	0.812	2.472	0.29	0.067	0.967	4.664	0.097	4.541	0.103	5	4	2	grassland	deciduous	coniferous
Wetness year-round	1.218	0.544	0.595	0.743	2.538	0.281	0.606	0.738	3.648	0.161	1.527	0.466	3	5	3	dry	medium	wet
Wetness winter	2.75	0.253	1.327	0.515	1.335	0.513	1.381	0.501	4.5	0.105	4.664	0.097	2	4	5	dry	medium	wet
Utilization level year-round	2.186	0.335	3	0.223	1.669	0.434	0.373	0.83	3.447	0.178	2.538	0.281	4	6	1	low	medium	high
Summer 2015
	Total dung fungi		Podospora		Sordaria		Sporormiella		Pollen total		Poaceae
Environmental variable	chi-square	p	chi-square	p	chi-square	p	chi-square	p	chi-square	p	chi-square	p	nCat1	nCat2	nCat3	Category 1	Category 2	Category 3
Vegetation	0.469	0.791	0.164	0.921	1.251	0.535	2.857	0.24	0.344	0.842	3.811	0.149	4	3	2	grassland	deciduous	coniferous
Wetness year-round	0.4007	0.816	0.805	0.669	0.607	0.738	1.829	0.401	1.778	0.411	2.56	0.278	3	5	1	dry	medium	wet
Wetness summer	1.699	0.428	1.823	0.402	4.228	0.121	4.571	0.102	0.284	0.867	2.56	0.278	5	3	1	dry	medium	wet
Utilization level year-round	0.61	0.737	0.655	0.721	1.119	0.571	2.857	0.24	2.467	0.291	4.867	0.088	4	4	1	low	medium	high
Utilization level summer	1.525	0.466	1.636	0.441	2.661	0.264	2.857	0.24	2.167	0.338	1.667	0.435	4	1	4	low	medium	high
Winter 2015-2016
	Total dung fungi		Podospora		Sordaria		Sporormiella		Pollen total		Poaceae
Environmental variable	chi-square	p	chi-square	p	chi-square	p	chi-square	p	chi-square	p	chi-square	p	nCat1	nCat2	nCat3	Category 1	Category 2	Category 3
Wetness year-round	2.267	0.322	2.688	0.261	0.236	0.889	0.483	0.785	2.143	0.343	0.857	0.657	1	3	2	dry	medium	wet
Summer 2016
	Total dung fungi		Podospora		Sordaria		Sporormiella		Pollen total		Poaceae
Environmental variable	chi-square	p	chi-square	p	chi-square	p	chi-square	p	chi-square	p	chi-square	p	nCat1	nCat2	nCat3	Category 1	Category 2	Category 3
Vegetation	2.032	0.362	0.414	0.813	8.889	0.012			0.015	0.993	7.636	0.022	5	3	2	grassland	deciduous	coniferous
Wetness year-round	1.379	0.502	0.414	0.813	5.185	0.075			1.276	0.528	2.818	0.244	3	5	2	dry	medium	wet
Wetness summer	0.698	0.705	0.348	0.84	2.222	0.329			0.942	0.624	2.251	0.325	5	3	2	dry	medium	wet
Utilization level year-round	2.94	0.23	0.931	0.628	5.625	0.06			0.933	0.627	6.955	0.031	4	5	1	low	medium	high
Utilization level summer	0.303	0.859	0.118	0.943	0.247	0.884			2.455	0.293	3.24	0.198	4	1	5	low	medium	high
All winter samples
	Total dung fungi		Podospora		Sordaria		Sporormiella		Pollen total		Poaceae
Environmental variable	chi-square	p	chi-square	p	chi-square	p	chi-square	p	chi-square	p	chi-square	p	nCat1	nCat2	nCat3	Category 1	Category 2	Category 3
Vegetation	2.333	0.311	1.461	0.482	3.979	0.137	1.249	0.536	5.378	0.068	5.095	0.078	8	7	2	grassland	deciduous	coniferous
Wetness year-round	0.758	0.685	0.328	0.849	1.908	0.385	0.205	0.902	3.865	0.145	1.291	0.524	4	8	5	dry	medium	wet
Wetness winter	2.586	0.274	1.741	0.419	2.091	0.351	1.745	0.418	5.042	0.08	5.168	0.075	2	7	8	dry	medium	wet
Utilization level year-round	2.165	0.339	2.232	0.328	2.52	0.284	1.177	0.555	3.227	0.199	2.789	0.248	7	9	1	low	medium	high
All summer samples
	Total dung fungi		Podospora		Sordaria		Sporormiella		Pollen total		Poaceae
Environmental variable	chi-square	p	chi-square	p	chi-square	p	chi-square	p	chi-square	p	chi-square	p	nCat1	nCat2	nCat3	Category 1	Category 2	Category 3
Vegetation	1.315	0.518	0.577	0.749	5.151	0.076	2.353	0.308	0.211	0.9	11.277	0.004	9	6	4	grassland	deciduous	coniferous
Wetness year-round	1.893	0.388	1.144	0.565	4.135	0.127	1.906	0.386	2.223	0.329	2.695	0.26	6	10	3	dry	medium	wet
Wetness summer	2.324	0.313	1.398	0.497	5.808	0.055	4.588	0.101	0.202	0.904	2.695	0.26	10	6	3	dry	medium	wet
Utilization level year-round	3.417	0.181	1.639	0.441	6.202	0.045	2.353	0.308	0.178	0.915	10.767	0.005	8	9	2	low	medium	high
Utilization level summer	1.069	0.586	1.12	0.571	0.987	0.611	2.353	0.308	3.446	0.179	3.482	0.175	8	2	9	low	medium	high
Oct 2014 - Sep 2015
	Total dung fungi		Podospora		Sordaria		Sporormiella		Pollen total		Poaceae
Environmental variable	chi-square	p	chi-square	p	chi-square	p	chi-square	p	chi-square	p	chi-square	p	nCat1	nCat2	nCat3	Category 1	Category 2	Category 3
Vegetation	0.327	0.849	0.007	0.997	2.583	0.275	0.331	0.847	5.15	0.076	2.861	0.239	9	7	4	grassland	deciduous	coniferous
Wetness year-round	2.427	0.297	1.916	0.384	3.194	0.203	0.791	0.673	5.067	0.079	3.404	0.182	6	10	4	dry	medium	wet
Wetness winter	0.612	0.737	0.69	0.708	0.231	0.891	0.958	0.619	5.721	0.057	2.329	0.312	4	8	8	dry	medium	wet
Wetness summer	3.617	0.164	2.931	0.231	6.349	0.042	1.56	0.458	2.6	0.272	3.258	0.196	10	6	4	dry	medium	wet
Utilization level year-round	1.652	0.438	1.631	0.442	2.149	0.342	1.44	0.487	5.786	0.055	1.786	0.409	8	10	2	low	medium	high
Utilization level summer	0.037	0.982	0.332	0.847	0.814	0.666	1.925	0.382	0.214	0.898	0.064	0.969	8	2	10	low	medium	high
Oct 2015 - Sep 2016
	Total dung fungi		Podospora		Sordaria		Sporormiella		Pollen total		Poaceae
Environmental variable	chi-square	p	chi-square	p	chi-square	p	chi-square	p	chi-square	p	chi-square	p	nCat1	nCat2	nCat3	Category 1	Category 2	Category 3
Vegetation	4.368	0.113	2.229	0.328	7.813	0.02	0.321	0.852	0.912	0.634	1.765	0.414	8	6	2	grassland	deciduous	coniferous
Wetness year-round	3.558	0.169	1.175	0.556	3.567	0.168	0.946	0.623	2.09	0.352	0.485	0.785	4	8	4	dry	medium	wet
Wetness winter	5.285	0.071	1.576	0.455	7.284	0.026	0.314	0.855	1.289	0.525	0.407	0.816	2	7	7	dry	medium	wet
Wetness summer	2.063	0.357	0.521	0.771	4.409	0.11	0.946	0.623	1.125	0.57	1.257	0.533	8	4	4	dry	medium	wet
Utilization level year-round	4.438	0.109	2.99	0.224	5.98	0.05	0.142	0.931	0.176	0.916	1.021	0.06	7	8	1	low	medium	high
Utilization level summer	1.754	0.416	1.395	0.498	1.947	0.378	2.743	0.254	0.643	0.725	0.945	0.623	7	2	7	low	medium	high
All pollen trap samples
Difference
	Total dung fungi		Podospora		Sordaria		Sporormiella		Pollen total		Poaceae
Environmental variable	chi-square	p	chi-square	p	chi-square	p	chi-square	p	chi-square	p	chi-square	p	nCat1	nCat2	nCat3	Category 1	Category 2	Category 3
Vegetation	2.482	0.289	0.706	0.703	7.432	0.024	0.392	0.822	5.099	0.078	4.266	0.118	17	13	6	grassland	deciduous	coniferous
Wetness year-round	2.654	0.265	1.51	0.47	4.716	0.095	0.71	0.701	5.589	0.061	1.983	0.371	10	18	8	dry	medium	wet
Wetness winter	1.799	0.407	0.12	0.942	4.213	0.122	0.423	0.809	5.643	0.06	1.809	0.405	6	15	15	dry	medium	wet
Wetness summer	2.457	0.293	1.677	0.432	8.276	0.016	1.181	0.554	1.818	0.403	2.477	0.29	18	10	8	dry	medium	wet
Utilization level year-round	3.769	0.152	2.05	0.359	6.81	0.033	1.363	0.506	3.307	0.191	2.327	0.312	15	18	3	low	medium	high
Utilization level summer	0.138	0.933	0.021	0.99	1.577	0.455	1.902	0.386	0.418	0.811	1.015	0.602	15	4	17	low	medium	high
